# Supplementary material for: State-Level Variation in Abortion Stigma and Women and Men’s Abortion Underreporting in the USA
Source: PubMed Central journal article supplement (PMC8547795; doi:10.1007/s11113-021-09657-4), 2021-05-20
Supplement: NIHMS1737501-supplement-Appendix_Table_S1.pdf [file NIHMS1737501-supplement-Appendix_Table_S1.pdf]

**Appendix Table S1.** Proportion of respondents with discordant reporting in the FTF and ACASI mode according to individual level characteristics, among respondents aged 15-44 reporting abortions in the ACASI mode, stratified by gender, pooled NSFG 2006-2015.

| Measure                                            | Male         |         | Female       |         |
|----------------------------------------------------|--------------|---------|--------------|---------|
|                                                    | % discordant | p-value | % discordant | p-value |
| <b>Total</b>                                       | 0.39         |         | 0.41         |         |
| <b>Age at interview</b>                            |              |         |              |         |
| 15-24                                              | 0.46         | 0.08    | 0.26         | 0.01    |
| 25-29 ( <i>ref</i> )                               | 0.37         |         | 0.40         |         |
| 30-34                                              | 0.37         | 0.86    | 0.44         | 0.51    |
| 35 and older                                       | 0.39         | 0.62    | 0.60         | 0.00    |
| <b>Race/ethnicity</b>                              |              |         |              |         |
| White, non-Hispanic ( <i>ref</i> )                 | 0.26         |         | 0.36         |         |
| Black, non-Hispanic                                | 0.45         | 0.00    | 0.40         | 0.40    |
| Other, non-Hispanic                                | 0.47         | 0.00    | 0.42         | 0.50    |
| Hispanic                                           | 0.57         | 0.00    | 0.50         | 0.01    |
| <b>Poverty status</b>                              |              |         |              |         |
| <100% ( <i>ref</i> )                               | 0.56         |         | 0.48         |         |
| 100-199%                                           | 0.39         | 0.00    | 0.39         | 0.03    |
| 200+%                                              | 0.32         | 0.00    | 0.34         | 0.02    |
| <b>Union status</b>                                |              |         |              |         |
| Married ( <i>ref</i> )                             | 0.44         |         | 0.56         |         |
| Cohabiting                                         | 0.43         | 0.87    | 0.38         | 0.01    |
| Not in union                                       | 0.33         | 0.00    | 0.35         | 0.00    |
| <b>Residence</b>                                   |              |         |              |         |
| Urban ( <i>ref</i> )                               | 0.42         |         | 0.38         |         |
| Suburban/Rural                                     | 0.38         | 0.21    | 0.44         | 0.15    |
| <b>Parity</b>                                      |              |         |              |         |
| 0 ( <i>ref</i> )                                   | 0.32         |         | 0.35         |         |
| 1+                                                 | 0.43         | 0.00    | 0.45         | 0.04    |
| <b>Nativity status</b>                             |              |         |              |         |
| U.S.-born ( <i>ref</i> )                           | 0.32         |         | 0.35         |         |
| Foreign-born                                       | 0.68         | 0.00    | 0.64         | 0.00    |
| <b>How important religion is in R's daily life</b> |              |         |              |         |
| Somewhat or not important ( <i>ref</i> )           | 0.34         |         | 0.34         |         |
| Very important                                     | 0.50         | 0.00    | 0.52         | 0.00    |
